# Supplementary material for: L'Observatoire du changement urbain à Lubumbashi: premiers bilan
Source: Royal Society of Chemistry journal article supplement (doi:10.1039/d1dt03561d), 2004-01-01
Supplement: d1dt03561d1.pdf [file d1dt03561d1.pdf]

## Supplementary Information

### Unique Cd<sub>0.5</sub>Zn<sub>0.5</sub>S/WO<sub>3-x</sub> direct Z-scheme heterojunction with S, O vacancies and twinning superlattices for efficient photocatalytic water-splitting

Teng Hou,<sup>a</sup> Hanchu Chen,<sup>a,c</sup> Yanyan Li,<sup>a</sup> Hui Wang,<sup>a,c</sup> Fengli Yu,<sup>a</sup> Caixia Li,<sup>b</sup> Haifeng Lin,<sup>\*a</sup>  
Shaoxiang Li<sup>b</sup> and Lei Wang<sup>a,b</sup>

<sup>a</sup> Key Laboratory of Eco-chemical Engineering, Key Laboratory of Optic-electric Sensing and Analytical Chemistry of Life Science, Shandong Provincial Key Laboratory of Olefin Catalysis and Polymerization, Taishan Scholar Advantage and Characteristic Discipline Team of Eco-Chemical Process and Technology, College of Chemistry and Molecular Engineering, Qingdao University of Science and Technology, Qingdao 266042, P. R. China

<sup>b</sup> Shandong Engineering Research Center for Marine Environment Corrosion and Safety Protection, College of Environment and Safety Engineering, Qingdao University of Science and Technology, Qingdao 266042, P. R. China

<sup>c</sup> Shandong Provincial Key Laboratory of Olefin Catalysis and Polymerization, Key Laboratory of Rubber-Plastics of Ministry of Education, School of Polymer Science and Engineering, Qingdao University of Science and Technology, Qingdao 266042, P. R. China

\* Corresponding author. E-mail address: hflin20088@126.com (H. Lin).

## Characterization results

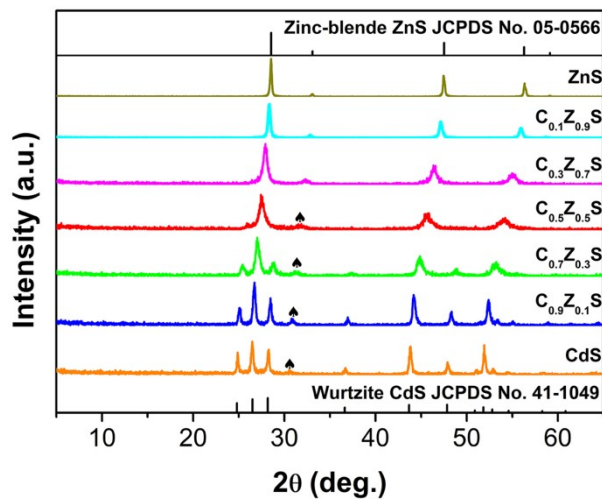

**Fig. S1.** XRD patterns of the  $C_mZ_{1-m}S$  ( $m = 0, 0.1, 0.3, 0.5, 0.7, 0.9$ , and  $1.0$ ) nanocrystals. The “spade” symbol indicates the zinc-blende CdS (JCPDS card No. 89-0440).

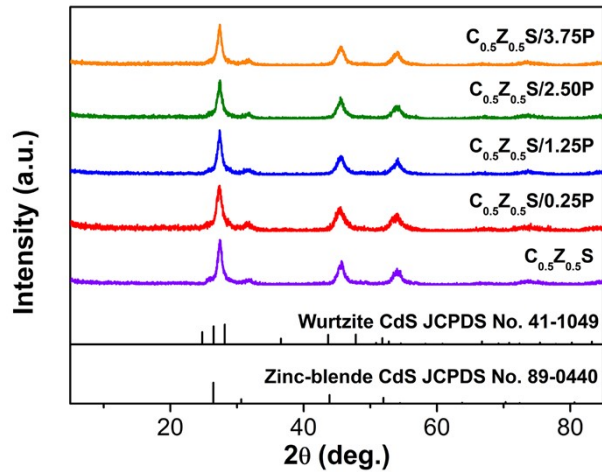

**Fig. S2.** XRD patterns of  $C_{0.5}Z_{0.5}S$  and the  $C_{0.5}Z_{0.5}S/yP$  synthesized with different  $NaH_2PO_4 \cdot H_2O$  dosages.

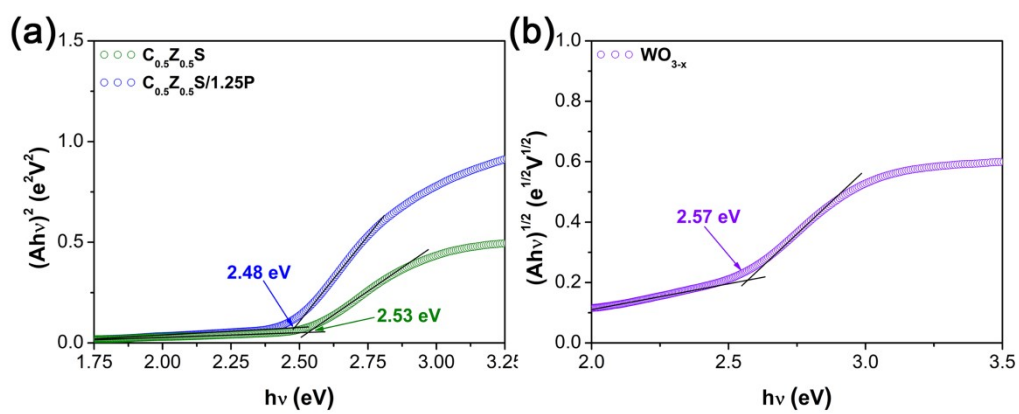

Fig. S3. Determined bandgaps of (a)  $C_{0.5}Z_{0.5}S$  and  $C_{0.5}Z_{0.5}S/1.25P$  and (b)  $WO_{3-x}$ .

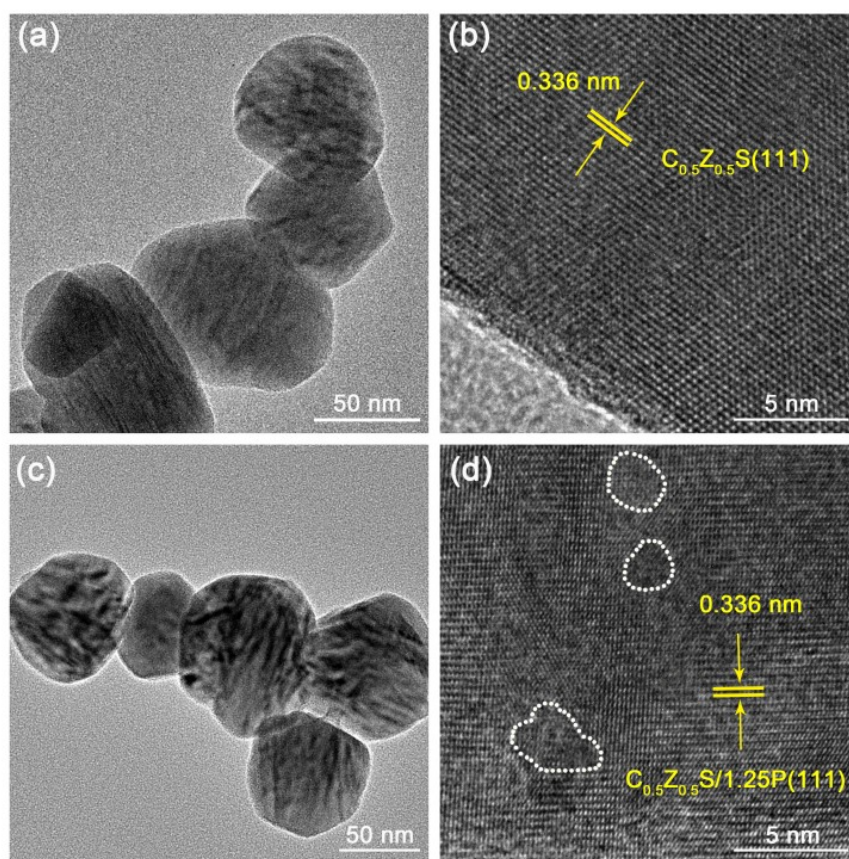

Fig. S4. (a, c) TEM and (b, d) HRTEM images of (a, b)  $C_{0.5}Z_{0.5}S$  and (c, d)  $C_{0.5}Z_{0.5}S/1.25P$ .

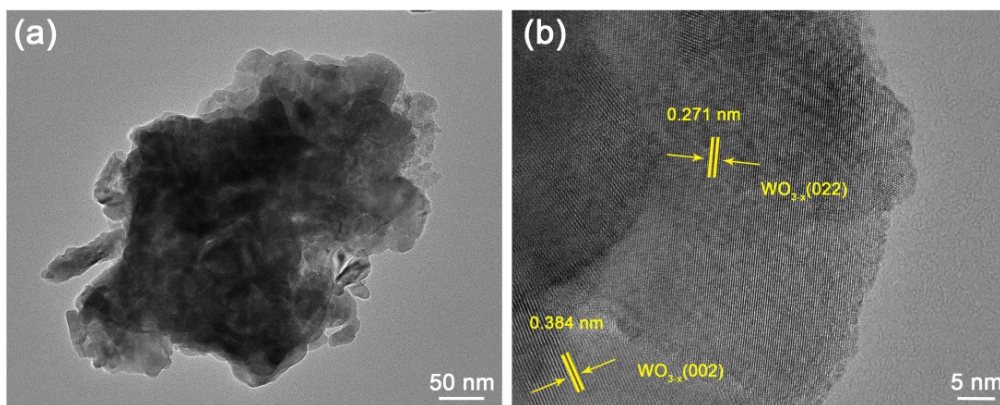

**Fig. S5.** (a) TEM and (b) HRTEM graphs of  $\text{WO}_{3-x}$ .

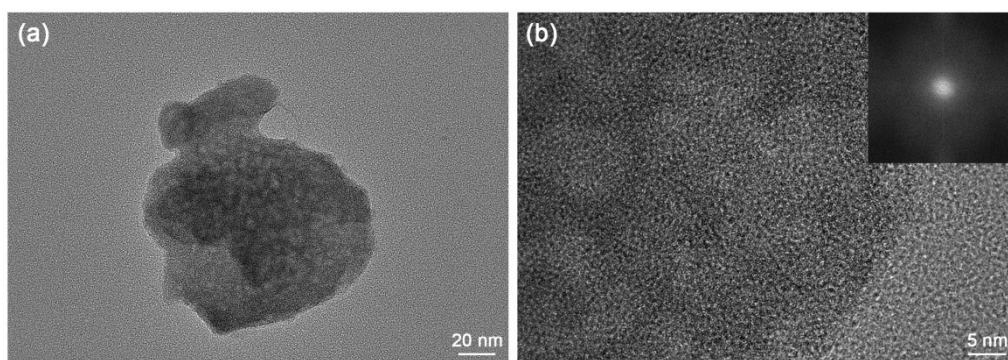

**Fig. S6.** (a) TEM and (b) HRTEM images of  $\text{A-WO}_{3-x}$ . The inset in the upper right corner of (b) is the corresponding FFT result.

**Table. S1.** Elemental compositions of  $\text{C}_{0.5}\text{Z}_{0.5}\text{S}$ ,  $\text{C}_{0.5}\text{Z}_{0.5}\text{S}/1.25\text{P}$ , and  $\text{C}_{0.5}\text{Z}_{0.5}\text{S}/1.25\text{P}-7\% \text{WO}_{3-x}$  determined by ICP-OES measurement.

| Atomic ratios   | $\text{C}_{0.5}\text{Z}_{0.5}\text{S}$ | $\text{C}_{0.5}\text{Z}_{0.5}\text{S}/1.25\text{P}$ | $\text{C}_{0.5}\text{Z}_{0.5}\text{S}/1.25\text{P}-7\% \text{WO}_{3-x}$ |
|-----------------|----------------------------------------|-----------------------------------------------------|-------------------------------------------------------------------------|
| Cd : Zn : S     | 1 : 0.94 : 1.90                        | 1 : 0.96 : 1.89                                     | -                                                                       |
| Cd : Zn : S : W | -                                      | -                                                   | 1 : 0.93 : 1.87 : 0.07                                                  |

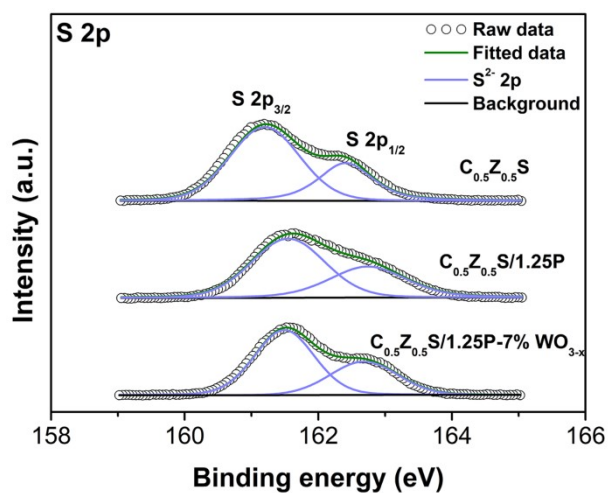

Fig. S7. S 2p XPS spectra of  $C_{0.5}Z_{0.5}S$ ,  $C_{0.5}Z_{0.5}S/1.25P$ , and  $C_{0.5}Z_{0.5}S/1.25P-7\% WO_{3-x}$ .

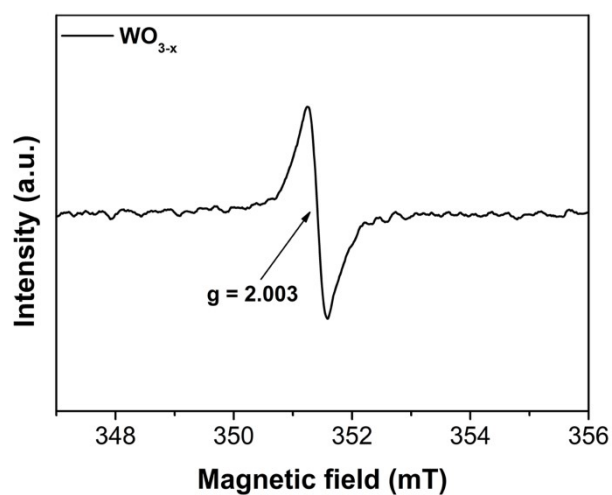

Fig. S8. EPR spectrum of  $WO_{3-x}$  nanocrystals.

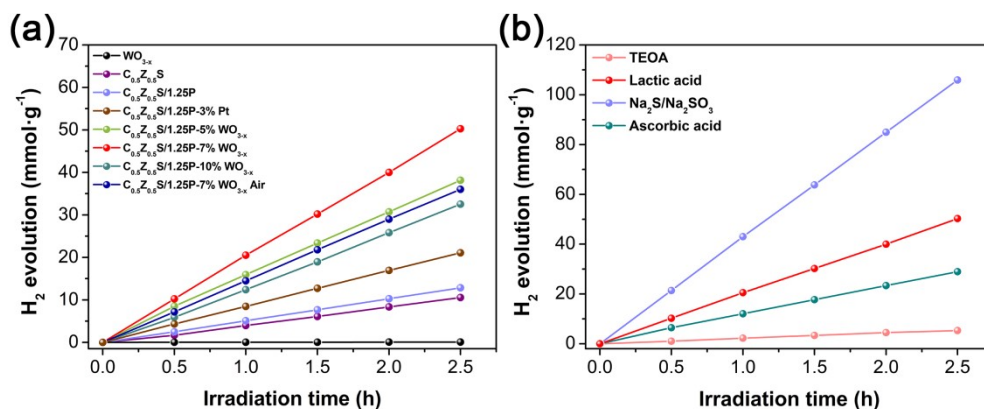

Fig. S9. (a) Photocatalytic HER activities of different samples. (b) The influence of hole scavengers on the HER property of  $C_{0.5}Z_{0.5}S/1.25P-7\% WO_{3-x}$ .

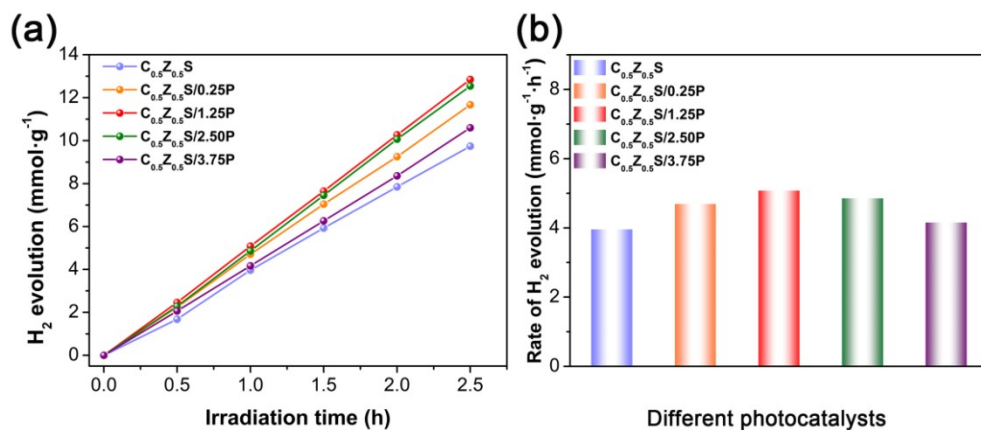

**Fig. S10.** (a) Photocatalytic HER activities and (b) the corresponding rates of C<sub>0.5</sub>Z<sub>0.5</sub>S and C<sub>0.5</sub>Z<sub>0.5</sub>S/yP prepared with varying NaH<sub>2</sub>PO<sub>2</sub>·H<sub>2</sub>O dosages.

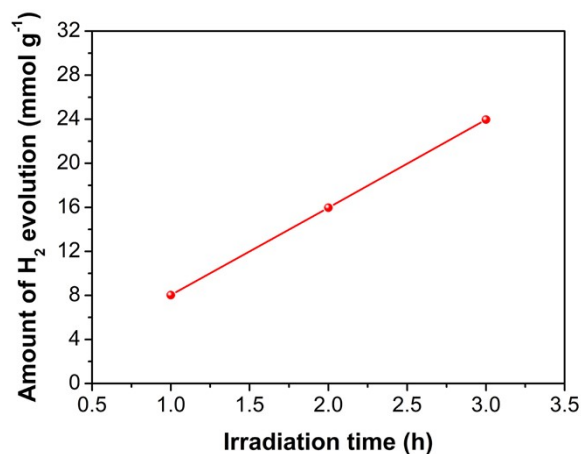

**Fig. S11.** Photocatalytic H<sub>2</sub> evolution of C<sub>0.5</sub>Z<sub>0.5</sub>S/1.25P-7% WO<sub>3-x</sub> under 420-nm light irradiation.

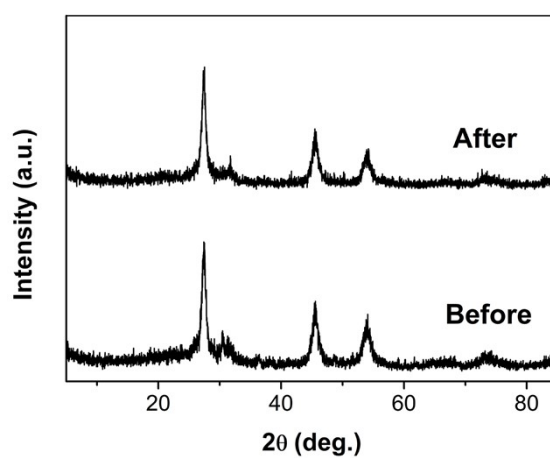

**Fig. S12.** XRD patterns of the C<sub>0.5</sub>Z<sub>0.5</sub>S/1.25P-7% WO<sub>3-x</sub> composite before and after photocatalytic stability test.

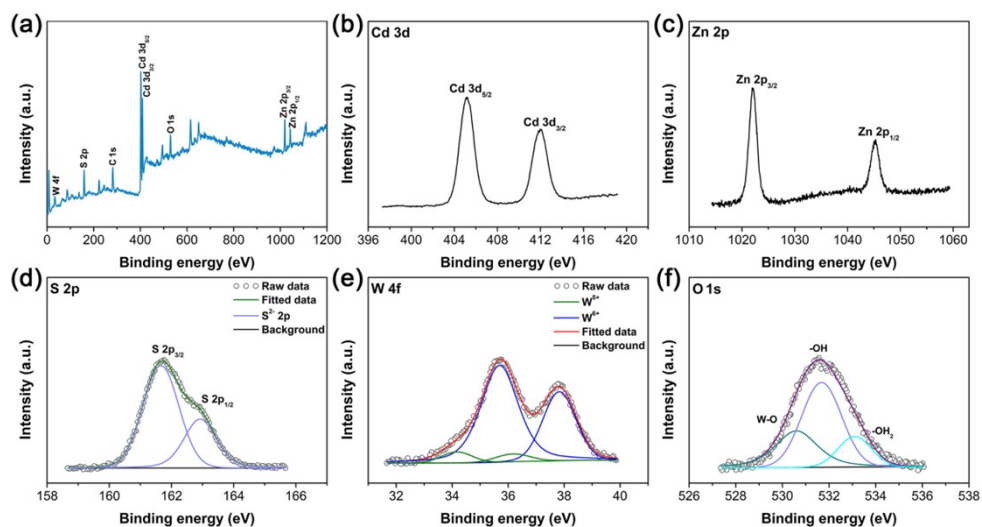

**Fig. S13.** (a) XPS survey spectrum, (b) Cd 3d, (c) Zn 2p, (d) S 2p, (e) W 4f, and (f) O 1s XPS spectra of the  $C_{0.5}Z_{0.5}S/1.25P-7\% WO_{3-x}$  after cyclic HER test.

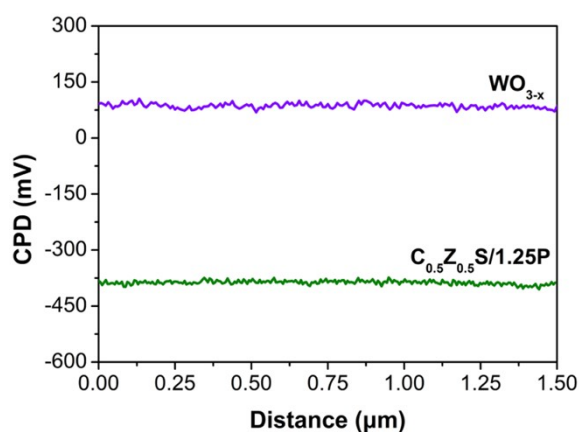

**Fig. S14.** Contact potential differences of  $WO_{3-x}$  and  $C_{0.5}Z_{0.5}S/1.25P$  in relation to the chromium probe.

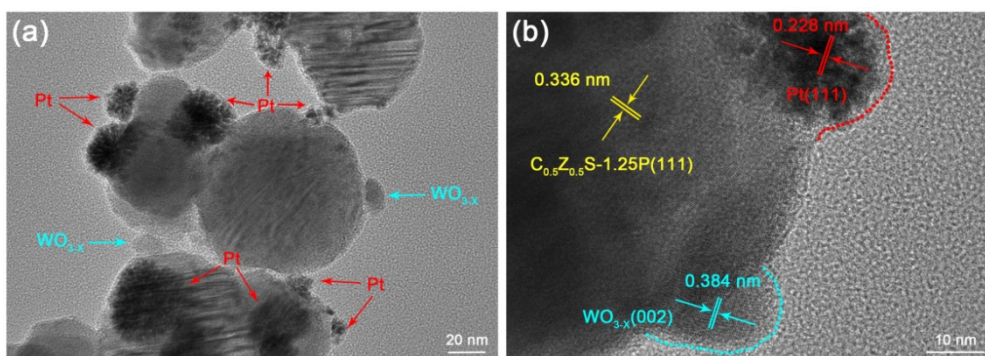

**Fig. S15.** (a) TEM and (b) HRTEM photographs of the  $C_{0.5}Z_{0.5}S/1.25P-7\% WO_{3-x}$  composite deposited with Pt nanocrystals via visible-light irradiation.

**Table. S2.** Comparison on the photocatalytic HER activities of WO<sub>3</sub>- and CdS-based photocatalysts.

| Photocatalyst                                                                        | Hole scavenger<br>(aqueous solution)              | Light source<br>(Xe lamp) | Maximum rate<br>(mmol·h <sup>-1</sup> ·g <sup>-1</sup> ) | AQE<br>(420 nm) | Reference |
|--------------------------------------------------------------------------------------|---------------------------------------------------|---------------------------|----------------------------------------------------------|-----------------|-----------|
| Cd <sub>0.5</sub> Zn <sub>0.5</sub> S/WO <sub>3-x</sub>                              | Lactic acid                                       | λ > 420 nm                | 20.50                                                    | 18.0%           | This work |
| Cd <sub>0.5</sub> Zn <sub>0.5</sub> S/WO <sub>3-x</sub>                              | Na <sub>2</sub> S/Na <sub>2</sub> SO <sub>3</sub> | λ > 420 nm                | 42.97                                                    | -               | This work |
| WO <sub>3</sub> /ZnIn <sub>2</sub> S <sub>4</sub>                                    | Na <sub>2</sub> S/Na <sub>2</sub> SO <sub>3</sub> | λ > 420 nm                | 1.95                                                     | 18.7%           | 1         |
| WO <sub>3</sub> /CoP                                                                 | TEOA                                              | AM 1.5G                   | 4.37                                                     | 2.0%            | 2         |
| WO <sub>3</sub> @MoS <sub>2</sub> /CdS                                               | Lactic acid                                       | λ > 420 nm                | 8.20                                                     | -               | 3         |
| In <sub>2</sub> O <sub>3</sub> /CdZnS                                                | Na <sub>2</sub> S/Na <sub>2</sub> SO <sub>3</sub> | λ > 420 nm                | 1.11                                                     | 0.3%            | 4         |
| CdS/(WO <sub>3</sub> &WS <sub>2</sub> )                                              | Lactic acid                                       | λ > 400 nm                | 0.75                                                     | -               | 5         |
| Cd <sub>0.5</sub> Zn <sub>0.5</sub> S/RP                                             | -                                                 | λ > 420 nm                | 0.14                                                     | 0.3%            | 6         |
| WS <sub>2</sub> /WO <sub>3</sub>                                                     | Lactic acid                                       | UV-vis light              | 0.68                                                     | -               | 7         |
| WS <sub>2</sub> -WO <sub>3</sub> ·H <sub>2</sub> O/g-C <sub>3</sub> N <sub>4</sub>   | Lactic acid                                       | λ > 420 nm                | 1.28                                                     | -               | 8         |
| Ni <sub>2</sub> P/Cd <sub>0.5</sub> Zn <sub>0.5</sub> S                              | Na <sub>2</sub> S/Na <sub>2</sub> SO <sub>3</sub> | λ > 420 nm                | 1.31                                                     | 29.0%           | 9         |
| g-C <sub>3</sub> N <sub>4</sub> /WO <sub>3</sub>                                     | TEOA                                              | AM 1.5G                   | 3.12                                                     | -               | 10        |
| Zn <sub>0.5</sub> Cd <sub>0.5</sub> S/CoP                                            | Ascorbic acid                                     | AM 1.5G                   | 12.18                                                    | 4.4%            | 11        |
| WO <sub>3</sub> @SnS <sub>2</sub>                                                    | Methanol                                          | AM 1.5G                   | 0.13                                                     | -               | 12        |
| SiO <sub>2</sub> /Ni <sub>2</sub> P/rGO/Cd <sub>0.5</sub> Zn <sub>0.5</sub> S        | Na <sub>2</sub> S/Na <sub>2</sub> SO <sub>3</sub> | λ > 420 nm                | 11.67                                                    | 15.6%           | 13        |
| Au NPs/Cd <sub>0.5</sub> Zn <sub>0.5</sub> S                                         | TEOA                                              | λ > 400 nm                | 12.18                                                    | -               | 14        |
| Cd <sub>0.5</sub> Zn <sub>0.5</sub> S/Bi <sub>2</sub> S <sub>3</sub>                 | Na <sub>2</sub> S/Na <sub>2</sub> SO <sub>3</sub> | λ > 400 nm                | 16.30                                                    | 19.6%           | 15        |
| Cd <sub>0.5</sub> Zn <sub>0.5</sub> S/BiVO <sub>4</sub>                              | Na <sub>2</sub> S/Na <sub>2</sub> SO <sub>3</sub> | λ > 420 nm                | 2.35                                                     | 24.1%           | 16        |
| Cd <sub>0.5</sub> Zn <sub>0.5</sub> S/CoO                                            | Na <sub>2</sub> S/Na <sub>2</sub> SO <sub>3</sub> | λ > 420 nm                | 7.95                                                     | 37.1%           | 17        |
| Cd <sub>0.5</sub> Zn <sub>0.5</sub> S@Bi <sub>2</sub> Fe <sub>4</sub> O <sub>9</sub> | Na <sub>2</sub> S/Na <sub>2</sub> SO <sub>3</sub> | λ > 420 nm                | 0.81                                                     | -               | 18        |
| Cd <sub>0.5</sub> Zn <sub>0.5</sub> S/Co <sub>0.85</sub> Se                          | Na <sub>2</sub> S/Na <sub>2</sub> SO <sub>3</sub> | λ > 420 nm                | 7.59                                                     | 15.9%           | 19        |
| Ni(OH) <sub>2</sub> /Zn <sub>0.5</sub> Cd <sub>0.5</sub> S                           | Na <sub>2</sub> S/Na <sub>2</sub> SO <sub>3</sub> | λ > 400 nm                | 6.87                                                     | 16.8%           | 20        |



## References:

- 1 Y. Wang, D. Chen, Y. Hu, L. Qin, J. Liang, X. Sun and Y. Huang, *Sustain. Energy Fuels*, 2020, **4**, 1681-1692.
- 2 T. Li, X. Guo, L. Zhang, T. Yan and Z. Jin, *Int. J. Hydrogen Energy*, 2021, **46**, 20560-20572.
- 3 L. Zhang, H. Zhang, C. Jiang, J. Yuan, X. Huang, P. Liu and W. Feng, *Appl. Catal. B: Environ.*, 2019, **259**, 118073.
- 4 H. Yang, J. Tang, Y. Luo, X. Zhan, Z. Liang, L. Jiang, H. Hou and W. Yang, *Small*, 2021, **17**, 2102307.
- 5 H. Wang, C. Li, L. Ying and P. Fang, *Appl. Surf. Sci.*, 2018, **448**, 539-546.
- 6 F. Liu, F. Xue, Y. Si, G. Chen, X. Guan, K. Lu and M. Liu, *ACS Appl. Nano Mater.*, 2021, **4**, 759-768.
- 7 S. Zhang, S. Chen, D. Liu, J. Zhang and T. Peng, *Appl. Surf. Sci.*, 2020, **529**, 147013.
- 8 X. Wang, G. Hai, B. Li, Q. Luan, W. Dong and G. Wang, *Chem. Eng. J.*, 2021, **426**, 130822.
- 9 S. Peng, Y. Yang, J. Tan, C. Gan and Y. Li, *Appl. Surf. Sci.*, 2018, **447**, 822-828.
- 10 W. Yu, J. Chen, T. Shang, L. Chen, L. Gu and T. Peng, *Appl. Catal. B: Environ.*, 2017, **219**, 693-704.
- 11 P. Wang, S. Zhan, H. Wang, Y. Xia, Q. Hou, Q. Zhou, Y. Li and R. R. Kumar, *Appl. Catal. B: Environ.*, 2018, **230**, 210-219.
- 12 X. Zhang, R. Zhang, S. Niu, J. Zheng and C. Guo, *J. Colloid Interface Sci.*, 2019, **554**, 229-238.
- 13 P. Zhang, C. Xue, Y. Li, S. Guo, X. Zhang, P. Zhang and G. Shao, *Chem. Eng. J.*, 2021, **404**, 126497.
- 14 Y. Liu, C. Du, C. Zhou and S. Yang, *J. Ind. Eng. Chem.*, 2019, **72**, 338-345.
- 15 M. Li, J. Sun, B. Cong, S. Yao and G. Chen, *Chem. Eng. J.*, 2021, **415**, 128868.
- 16 C. Zeng, Y. Hu, T. Zhang, F. Dong, Y. Zhang and H. Huang, *J. Mater. Chem. A*, 2018, **6**, 16932-16942.
- 17 H. Zhao, L. Guo, C. Xing, H. Liu and X. Li, *J. Mater. Chem. A*, 2020, **8**, 1955-1965.
- 18 H. Hua, F. Feng, M. Du, Y. Ma, Y. Pu, J. Zhang and X. A. Li, *Appl. Surf. Sci.*, 2021, **541**, 148428.
- 19 X. Sun, H. Du, *ACS Sustainable Chem. Eng.*, 2019, **7**, 16320-16328.
- 20 X. Gao, D. Zeng, J. Yang, W. J. Ong, T. Fujita, X. He, J. Liu and Y. Wei, *Chin. J. Catal.*, 2021, **42**, 1137-1146.
